# Beyond members of the Flaviviridae family, sofosbuvir also inhibits chikungunya virus replication

Running Title: Chikungunya is susceptible to sofosbuvir

André C. Ferreira<sup>1,2,7#</sup>, Patrícia A. Reis<sup>1#</sup>, Caroline S. de Freitas<sup>1,7,#</sup>, Carolina Q. Sacramento<sup>1,7,#</sup>, Lucas Villas Bôas Hoelz<sup>3,#</sup>, Mônica M. Bastos<sup>3</sup>, Mayara Mattos<sup>1,7</sup>, Erick Correia Loiola<sup>4</sup>, Pablo Trindade<sup>4</sup>, Yasmine Rangel Vieira<sup>2,7</sup>, Giselle Barbosa-Lima<sup>2</sup>, Hugo C. de Castro Faria Neto<sup>1</sup>, Nubia Boechat<sup>3</sup>, Stevens K. Rehen<sup>4,5</sup>, Karin Brüning<sup>6</sup>, Fernando A. Bozza<sup>1,2</sup>, Patrícia T. Bozza<sup>1</sup> and Thiago Moreno L. Souza<sup>1,2,7,\*</sup>

#- These authors contributed equally as first authors.

## Affiliations:

1 – Laboratório de Imunofarmacologia, Instituto Oswaldo Cruz (IOC), Fundação Oswaldo Cruz (Fiocruz), Rio de Janeiro, RJ, Brazil.

2 – Instituto Nacional de Infectologia (INI), Fiocruz, Rio de Janeiro, RJ, Brazil.

3 – Instituto de Tecnologia de Fármacos (Farmanguinhos), Fiocruz, Rio de Janeiro, RJ, Brazil.

4 – D'Or Institute for Research and Education (IDOR), Rio de Janeiro, RJ, Brazil.

5 – Centro de Ciências da Saúde, Universidade Federal do Rio de Janeiro, Rio de Janeiro, RJ, Brazil.

6 – BMK Consortium: Blanver Farmoquímica Ltda; Microbiológica Química e Farmacêutica Ltda; Karin Bruning & Cia. Ltda, Brazil

7 - National Institute for Science and Technology on Innovation on Diseases of Neglected Populations (INCT/IDPN), Center for Technological Development in Health (CDTS), Fiocruz, Rio de Janeiro, RJ, Brazil.

28 **\*Correspondence footnote:**

29 Thiago Moreno L. Souza, PhD

30 \*\*\*\*\*

31 Fundação Oswaldo Cruz

32 Centro de Desenvolvimento Tecnológico em Saúde (CDTS)

33 Instituto Oswaldo Cruz (IOC)

34 Pavilhão Osório de Almeida, sala 16

35 Av. Brasil 4365, Manguinhos, Rio de Janeiro - RJ, Brasil, CEP 21060340

36 Tel.: +55 21 2562-1311

37 Email: [tmoreno@cdts.fiocruz.br](mailto:tmoreno@cdts.fiocruz.br)

38

39

40

41

42

43

44

45

46

47

48

49

50

51

52 **Abstract:** Chikungunya virus (CHIKV) causes a febrile disease associated with chronic arthralgia, which  
53 may progress to neurological impairment. Chikungunya fever (CF) is a consolidated public health problem,  
54 in tropical and subtropical regions of the world, where control of CHIKV vector, mosquitos of the *Aedes*  
55 genus, failed. Since there is no vaccine or specific treatment against CHIKV, infected patients receive only  
56 palliative care to alleviate pain and arthralgia. Thus, drug repurposing is necessary to identify antivirals  
57 against CHIKV. Recently, the structure and activity of CHIKV RNA polymerase was partially resolved,  
58 revealing similar aspects with the enzyme counterpart on other positive sense RNA viruses, such as  
59 members of the Flaviviridae family. We then evaluated if sofosbuvir, clinically approved against hepatitis C  
60 virus RNA polymerase, which also aims to dengue, Zika and yellow fever viruses replication, would inhibit  
61 CHIKV replication. Indeed, sofosbuvir was 5-times more selective in inhibiting CHIKV production in  
62 human hepatoma cells than ribavirin, a pan-antiviral drug. Although CHIKV replication in human induced  
63 pluripotent stem cell (iPS)-derived astrocytes was less sensitive to sofosbuvir's, compared to hepatoma cells  
64 – this drug still impaired virus production and cell death in a MOI-dependent manner. Sofosbuvir also  
65 exhibited antiviral activity *in vivo*, by preventing CHIKV-induced paw oedeme in adult mice, at 20  
66 mg/kg/day, and mortality on neonate mice model, at 40 and 80 mg/kg/day. Our data demonstrates that a  
67 prototypic alphavirus, CHIKV, is also susceptible to sofosbuvir. Since this is a clinically approved drug, it  
68 could pave the way to become a therapeutic option against CF.

69 **Keywords:** chikungunya, chikungunya virus, arthralgia, antiviral, sofosbuvir, drug

## 79 1. Introduction

80 Chikungunya virus (CHIKV) is a member of the *Togaviridae* family, genus alphavirus, which  
81 causes febrile debilitating illness associated with arthralgia and skin rash (1). Although prolonged and  
82 debilitating joint pain and oedema differentiate CHIKV infection among contemporary arboviruses, like  
83 dengue (DENV) and Zika (ZIKV) viruses, most often these agents display similar clinical signs and  
84 symptoms during the early phase of infection (1). Severe outcomes of CHIKV infection, leading to acute  
85 and convalescent neurological impairment, have also been described (2, 3).

86 Chikungunya fever (CF) is a consolidated public health problem with substantial impact in tropical  
87 and subtropical regions of the world, where *Aedes* spp mosquitoes are prevalent and control measures failed  
88 (1). In last 5 years, the Americas, African and Eurasian regions have been severely impacted by CHIKV (4).  
89 For instance, in Brazil, since 2014, the Asian and East-Central-South-African (ECSA) genotypes of CHIKV  
90 co-circulate (5-7), highlighting a substantial viral activity in a country historically hyperendemic for DENV.  
91 Since no specific treatment or vaccine against CHIKV exist, repurposing of clinically approved drugs,  
92 preferentially aiming a viral target, is a necessary response against CF.

93 CHIKV has a positive-sense single-stranded 11.8 kilobase RNA genome, which encodes four non-  
94 structural (nsP1-4) and five structural proteins (C, E1, E2, E3 and 6K) (8). Among these proteins, nsP4  
95 encodes for the viral RNA-dependent RNA polymerase (RDRP). Recently, nsP4 structure was partially  
96 resolved (9). As other RNA polymerases from positive sense RNA viruses, CHIKV nsP4 possesses well-  
97 conserved motifs, such as D-x(4,5)-D and GDD, spatially juxtaposed, wherein Asp binds Mg<sub>2+</sub> and Asn  
98 selects ribonucleotide triphosphates over dNTPs, determining RNA synthesis (10). Moreover, since the  
99 RDRP activity is absent on host cells, it constitutes a suitable target for antiviral intervention.

100 We, and others, have demonstrated that sofosbuvir, a clinically approved against hepatitis C virus  
101 (HCV) (11-13), also inhibits the replication of flaviviruses, like ZIKV, DENV and yellow fever virus (YFV)  
102 (14-19). Sofosbuvir is a safe and a well-tolerated drug, from 400 to 1200 mg daily in 24 weeks regimen.  
103 Sofosbuvir is a uridine monophosphate prodrug that requires the removal of the phosphate protections to  
104 enter a pathway that yields sofosbuvir triphosphate, the pharmacological active compound as antiviral (11).  
105 Although hepatic cells have the most effective system to remove sofosbuvir's phosphate protections,

functional assays reveals that other cells, relevant for arboviruses infection, may also activate sofosbuvir (11, 16, 20). As expected for a nucleotide analogue, sofosbuvir inhibit the RNA polymerase from different members of the Flaviviridae family, HCV, ZIKV, DENV, YFV (14-19). The conservation of RDRP domain of CHIKV nsP4, when compared to other viral RNA polymerases, led us to hypothesized that CHIKV could also be susceptible to sofosbuvir. Indeed, we originally demonstrated, by cellular assays and animal models, that CHIKV is susceptible to sofosbuvir.

## 2. Results

### 2.1. CHIKV RNA polymerase, nsP4, as the predictive target for sofosbuvir.

We considering the homology among viral RDRP to evaluate whether sofosbuvir docks on CHIKV RNA polymerase. For comparisons, the binding mode of sofosbuvir-triphosphate (SFV) and the natural substrate, UTP, were analyzed on the nsP4 model. Three docking simulations for each ligand (totalizing 30 poses per ligand) were carried out. The poses with the lowest energy was selected for analysis (Table 1 and Figure 1). SFV and UTP have similar modes of interaction, but different energy values, respectively, -78.41 and -108.78 arbitrary units (a.u.) (with respect to MolDock scores) (Table 1). Moreover, SFV interacted via H-bonds with Asn348, Ile369, Gly370, Asp371, and Cys411 (H-bond energy = -6.97 a.u.), whereas UTP formed H-bonds with Asn348, Ile369, and Gly370 (bond energy = -3.11 a.u.) (Table 1 and Figure 1). Both SFV and UTP also formed electrostatic attractive interactions with the two  $Mg^{2+}$  ions and repulsive interactions with Asp371. Consequently, SFV and UTP displayed electrostatic interaction energies of -117.12 a.u. and -112.84 a.u., respectively (Table 1 and Figure 1). SFV and UTP use similar amino acid residues for steric interactions Phe280, Asn344, Asn348, Ala367, Phe368, Ile369, Asp371, Asp372, Asn373, Ile374, and Cys411, resulting in energies equal to -24.50 a.u and 48.76 a.u, respectively. Nevertheless, minor differences with respect to steric interaction were observed: SFV docks onto Thr345 and Phe410, whereas UTP interacts with Leu250 and Phe251.

132 **Table 1: Summary of the interactions of SFV and UTP to nsP4 model of CHIKV.**

| #          | nsP4 model of CHIKV |                                        |                                  |                                        |                                               |                                                                                                                |               |
|------------|---------------------|----------------------------------------|----------------------------------|----------------------------------------|-----------------------------------------------|----------------------------------------------------------------------------------------------------------------|---------------|
|            | H-bond energy       | Residues (H-bond)                      | Electrostatic Interaction energy | Residues and Co-Factor (Electrostatic) | Steric interaction energy by PLP <sup>b</sup> | Residues and Co-Factor (Steric)                                                                                | MolDock score |
| <b>SFV</b> | -6.97 <sup>a</sup>  | Asn348, Ile369, Gly370, Asp371, Cys411 | -117.24                          | Asp371, Mg <sup>2+</sup>               | -24.50                                        | Phe280, Asn344, Thr345, Asn348, Ala367, Phe368, Ile369, Gly370, Asp371, Asp372, Asn373, Ile374, Phe410, Cys411 | -78.41        |
| <b>UTP</b> | -3.11               | Asn348, Ile369, Gly370                 | -112.84                          | Asp371, Mg <sup>2+</sup>               | -48.76                                        | Leu250, Phe251, Phe280, Asn344, Thr345, Asn348, Ala367, Ile369, Gly370, Asp371, Asp372, Asn373, Ile374, Cys411 | -108.78       |

133 <sup>a</sup>Arbitrary units; <sup>b</sup>Piecewise linear potential(21).

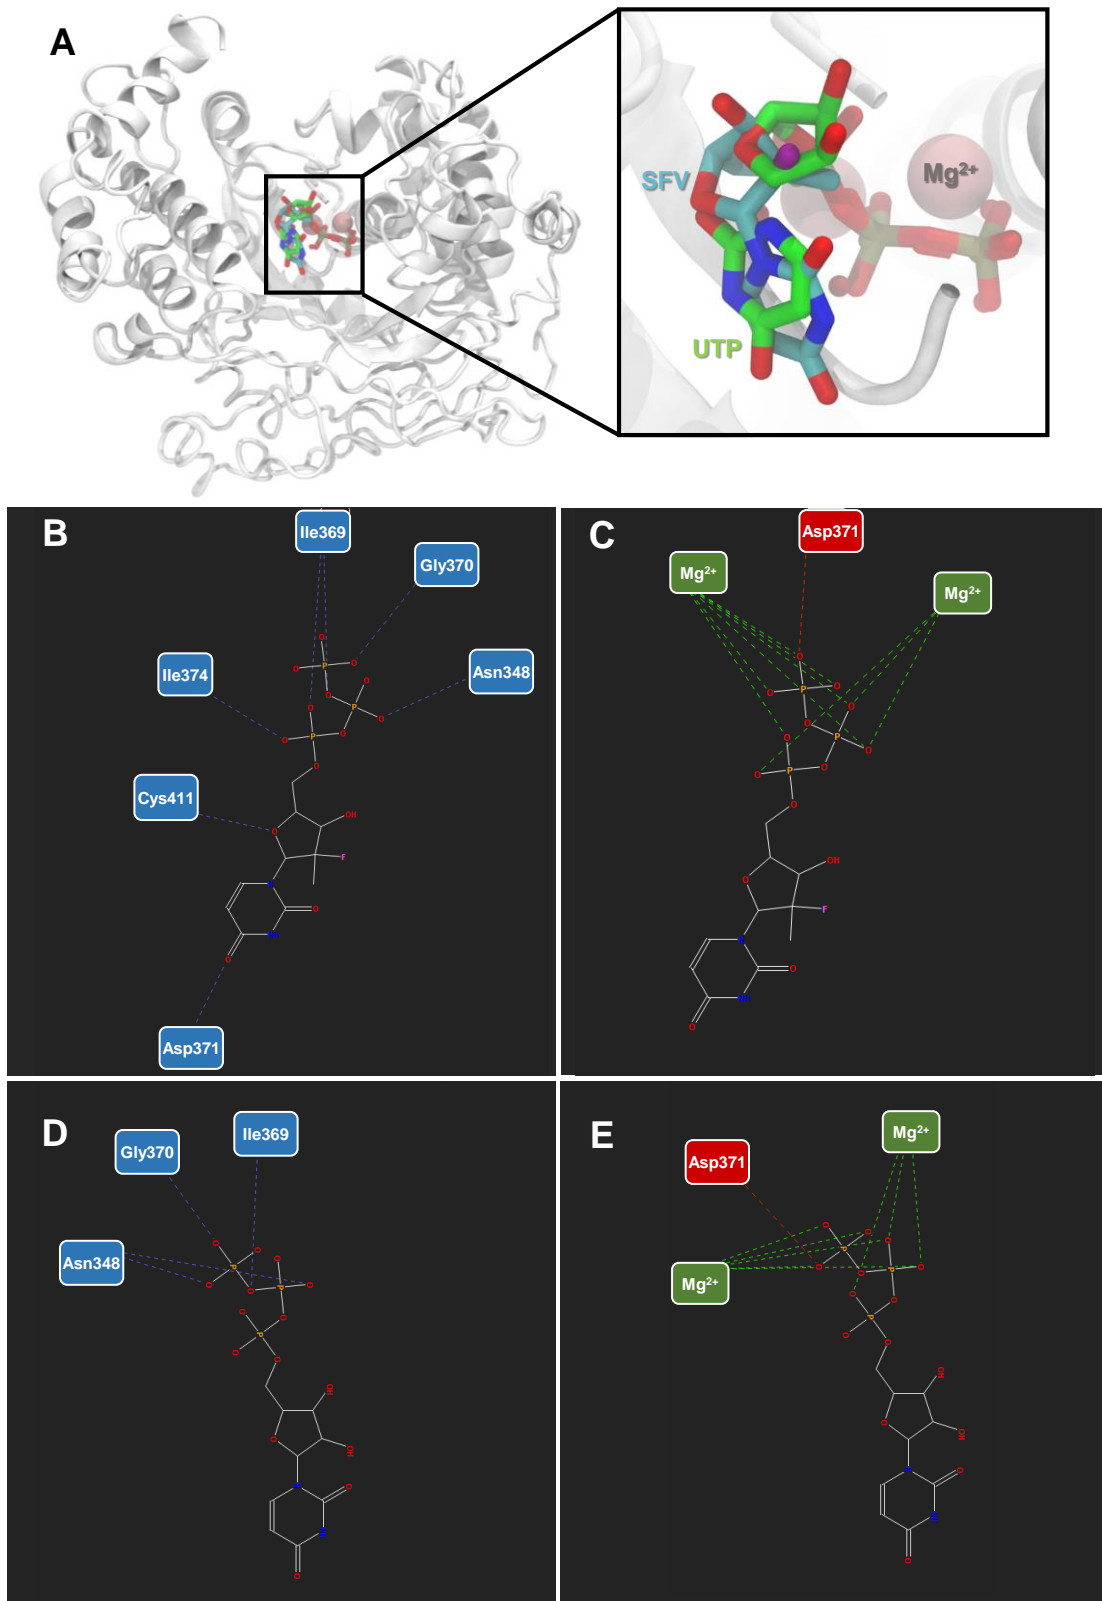

**Figure 1. Sofosbuvir triphosphate and nsP4 interactions.** (A) Structural representation of the nsP4 model of CHIKV and its interaction with SFV and UTP. Hydrogen bonds and electrostatic interactions between (B; C) SFV and (D; F) UTP, and nsP4 model of CHIKV. The interactions are represented by blue (H-bonds), green (attractive electrostatic interactions), and red (repulsive electrostatic interactions) interrupted lines. The nitrogen atoms are shown in blue, oxygen in red, fluor in pink, and the carbon chain in gray.

## 141 **2.2. CHIKV is susceptible to sofosbuvir *in vitro***

142 To evaluate if sofosbuvir is indeed endowed with anti-CHIKV activity, phenotypic antiviral assays  
143 were performed in human cells previously associated to peripheral virus replication and invasion of the  
144 nervous system (22), respectively, hepatoma (Huh-7) and astrocytes derived from induced pluripotent stem  
145 (iPS) cells. Supernatants from these infected cultures were harvested and tittered in Vero cells. We observed  
146 a dose-dependent inhibition of CHIKV production in hepatoma cells (Figure 2 and Table 2), which is known  
147 to possess the machinery to convert the sofosbuvir prodrug to the pharmacologically active metabolite (12).  
148 Sofosbuvir was two-fold more potent and 25 % less cytotoxic than ribavirin (Table 2). Consequently,  
149 selectivity index (SI) for sofosbuvir was almost five-fold better than for ribavirin, a pan-antiviral drug.  
150 Moreover, astrocytes succumb to CHIKV infection in a multiplicity of infection (MOI)-dependent manner,  
151 and sofosbuvir partially prevented cell mortality (Figure 3A). Accordingly, sofosbuvir decreased CHIKV  
152 replication on astrocytes by 50 % at MOI of 1 (Figure 3B).



168

169

170

171

172

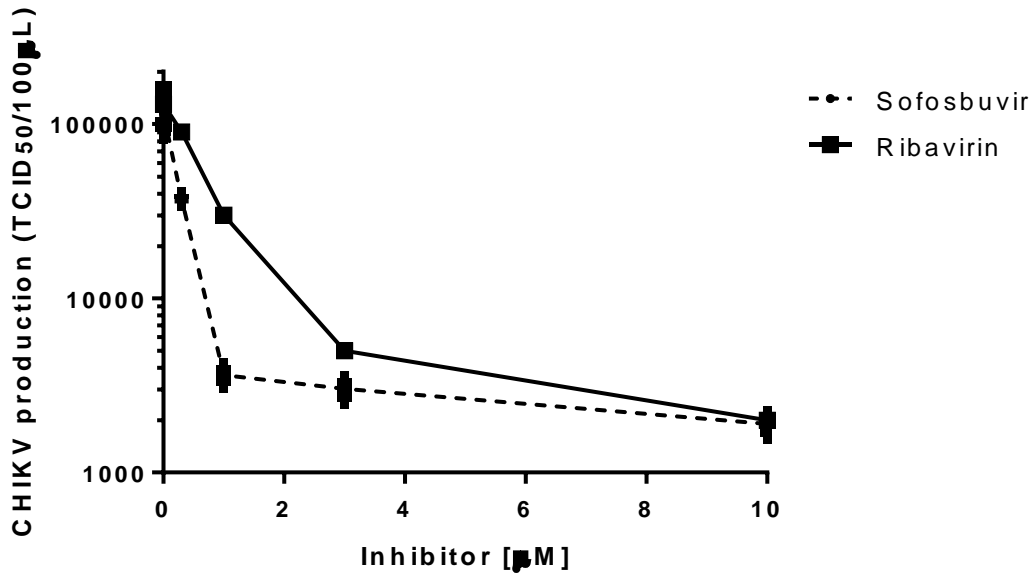

173

**Figure 2 - Pharmacology**

174

of Sofosbuvir against CHIKV. Huh-7 were infected with CHIKV at MOI of 0.1 and exposed to various concentrations of sofosbuvir or ribavirin for 24 h. Supernatant was harvested and tittered in Vero cells by TCID<sub>50</sub>/mL. The data represent means ± SEM of three independent experiments.

177

178

**Table 2 – Pharmacological parameters associated to drug inhibition of CHIKV replication**

179

| Drug       | EC <sub>50</sub> (µM) | CC <sub>50</sub> (µM) | SI* |
|------------|-----------------------|-----------------------|-----|
| Sofosbuvir | 0.8 ± 0.08            | 402 ± 32              | 502 |
| Ribavirin  | 1.9 ± 0.3             | 298 ± 22              | 157 |

180

\*SI – Selectivity Index (CC<sub>50</sub>/EC<sub>50</sub>)

181

182

183

184

185

186

187

188

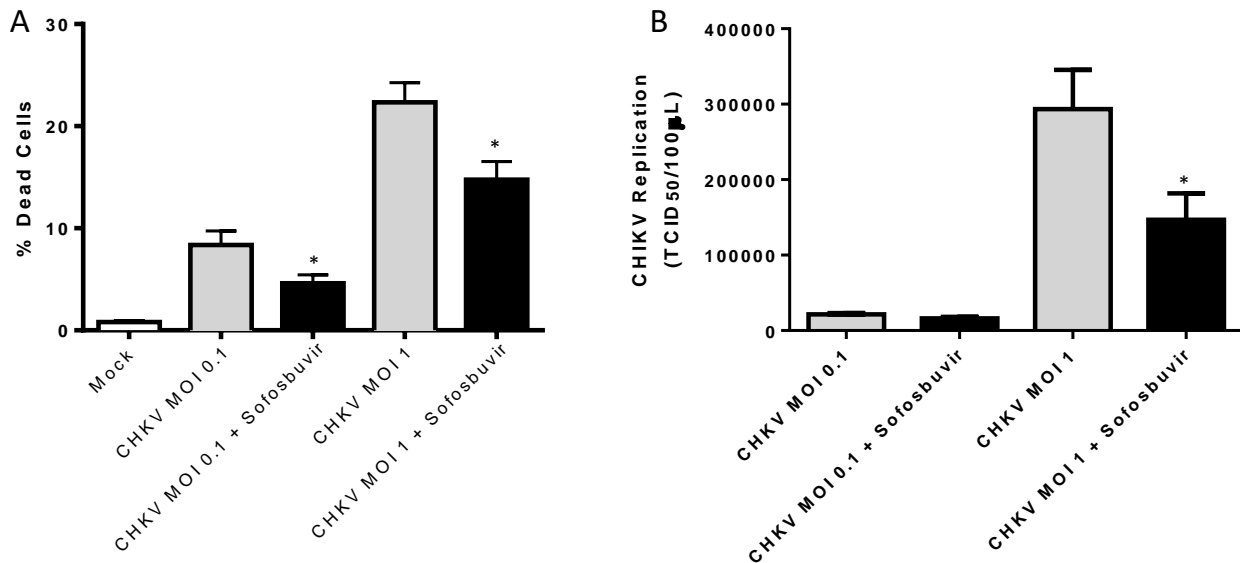

189

190 **Figure 3 – Sofosbuvir inhibits CHIKV replication in human iPS cell-derived astrocytes.** Astrocytes were infected at the  
191 indicated MOIs and treated with sofosbuvir at 10 µM. After 5 days, cells were labeled for activated caspase-3/7 and propidium  
192 iodide (A) and virus in the supernatant tittered in Vero cells (B). The data represent means ± SEM of three independent  
193 experiments performed with five technical replicates. \* $P < 0.05$  for the comparison between the infected untreated (gray bars) and  
194 treated (black bars) groups.

195

196

197

198

199

200

201

202

203

204

205  
206  
207  
208  
209  
210  
211  
212  
213  
214  
215  
216  
217  
218  
219  
220  
221  
222  
223  
224  
225  
226  
227  
228  
229  
230  
231

**Sofosbuvir protected CHIKV-infected mice, using models of arthralgia and severe infection.**

To analyze whether *in vitro* results translate into a systemic protection, we treated CHIKV-infected mouse with sofosbuvir. Initially, treatment was performed in the arthralgia mouse model, in which sofosbuvir was given orally (20 mg/kg/day) one-hour prior to the injection of  $2 \times 10^4$  TCID<sub>50</sub> into the right hind paw. We observed that early after infection paw oedema did not ameliorate with sofosbuvir, suggesting that this drug had no effect on the swelling associated with the insult caused by the injection (Figure 4A-C). Importantly, in the untreated and infected mice, paw oedema was more intense in the following days, whereas the treated animals displayed no differences to mock-infected mice (Figure 4D-F and Figure 5).

232

233

234

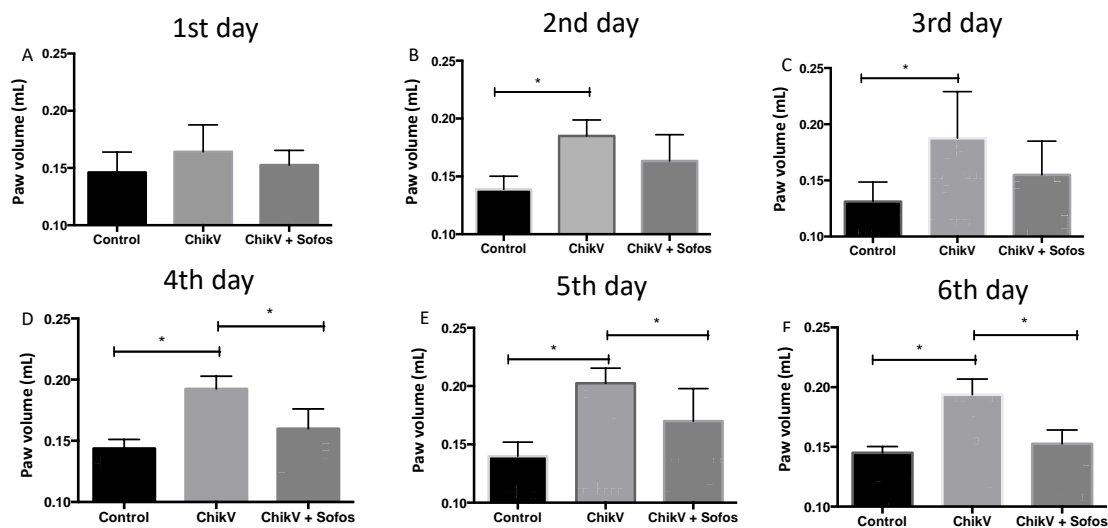

235

236

237

238

239

240

**Figure 4. Sofosbuvir ameliorates CHIKV-induced paw oedema.** Male Swiss Webster mice (20-25 g) received RPMI medium (Control) or  $10^4$  TCID<sub>50</sub> of CHIKV into 50  $\mu$ l per paw in the ventral side of the right hind foot. Oral treatment with sofosbuvir (sofos) (20 mg/kg/day) started one hour prior to infection. Panels A to F indicates the days after infection, from the first to the sixth, when paw volume was measured in the hydropletismometer. Paw oedema is interpreted by the increase in paw volume over control in the \* $p < 0.05$  Tukey's multiple comparisons test (n=8/group).

246

247

248

249

250

251

241

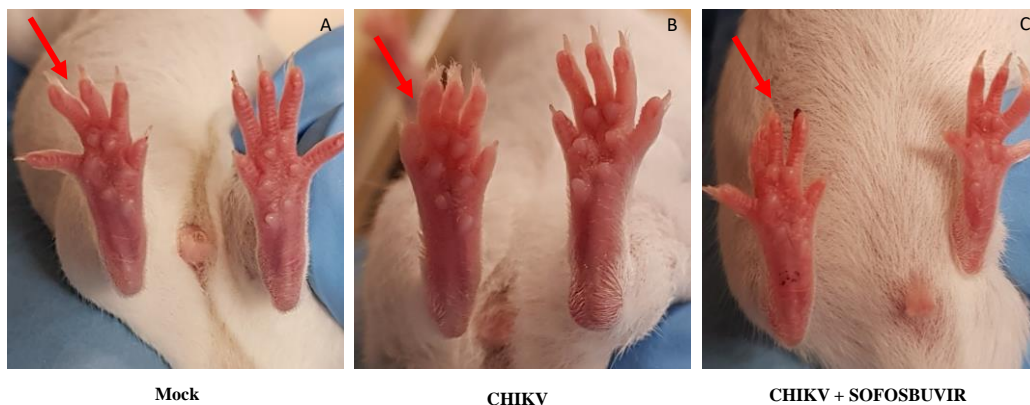

**Figure 5. Representative CHIKV-associated paw oedema and sofosbuvir's antiviral effect on the 6<sup>th</sup> day after infection.** (A) Control, (B) CHIKV and (C) CHIKV + sofosbuvir. Arrows indicate the infected paw.

252

253

254

255

256

257

258

259

260

261

262

263

264

265

266

267

268

269

270

271

272

273

274

275

276

277

278

Subsequently, we studied sofosbuvir's ability to enhance the survival of CHIKV-infected neonatal mice. Three days-old Swiss mice were infected with CHIKV ( $2 \times 10^5$  TCID<sub>50</sub>) intraperitoneally. Treatment was carried out daily, initially with 20 mg/kg, also by intraperitoneal injection, beginning at one day prior to infection (pre-treatment) or on second day after infection (late-treatment). Although pre-treatment doubled the mean time of survival ( $T_{50}$ ) when compared to mock-infected animals, all infected mice deceased after 6 days of infection (Figure 6A). Late-treatment had marginal contribution to enhance the  $T_{50}$  of mice survival (Figure 6A). Of note, post-natal development of the infected mice varied only marginally among the groups (Figure 6B). Under the same experimental conditions of infection, we next performed pre-treatments with different doses of sofosbuvir. Doses of 40 and 80 mg/kg/day doubled and tripled the percentage of animal survival (Figure 6C). At 80 mg/kg/day animals post-natal development were significantly superior to the infected controls (Figure 6D).

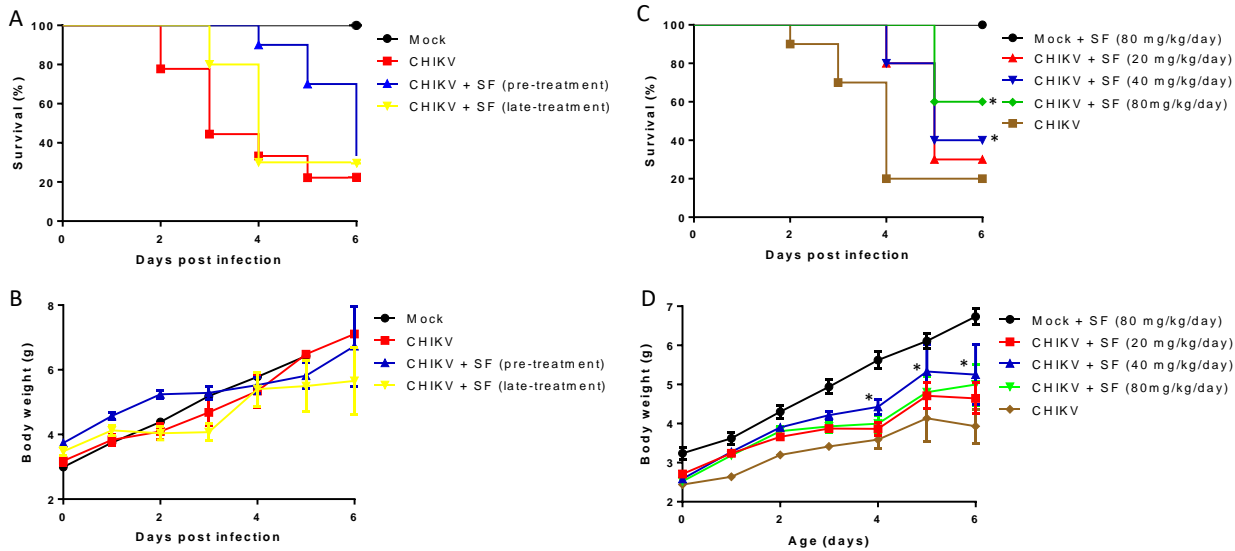

290

291 **Figure 6. Sofosbuvir, at concentrations of 40 and 80 mg/kg/day, increases survival and inhibits weight loss of CHIKV-**  
292 **infected mice.** Three-day-old Swiss mice were infected with CHIKV ( $2 \times 10^5$  TCID<sub>50</sub>) and treated with sofosbuvir (SF) either 1  
293 day before (pre-treatment) or 2 days after infection (late-treatment). Survival (A and C) and weight variation (B and D) were  
294 assessed during the course of treatment. Panels A and B represent experiments of both pre- and late-treatment with sofosbuvir at  
295 20 mg/kg/day. Panels C and D represent pre-treatment with indicated concentrations of sofosbuvir. Survival was statistically  
296 assessed by Log-rank (Mantel-Cox) test. Differences in weight are displayed as the means  $\pm$  SEM, and two-way ANOVA for each  
297 day was used to assess the significance. Independent experiments were performed with at least 10 mice/group ( $n = 30$ ). \*  $P < 0.01$ .

298

299

300

301

302

303

304

305

306

307

308

309

310

311

312

313

314

315

316

317

318

319

320

321

322

323

324

325

326

327

328

329

330

331

332

333

334

335

Since some infected and untreated animals survived from experiments described in Figures 6, we evaluated if they had neuromotor sequelae and compared to treated survivors. Animals were held in a supine position with all four paws facing up, and then released. The time to flip over onto its stomach with all four paws touching the surface was measured, as proxy of neuromotor function. CHIKV-infected mice took a median time of 10-20 second to get to the upright position, whereas mock-infected animals did it immediately (Figure 7). Importantly, CHIKV-infected and sofosbuvir pre-treated animals did not present neuromotor sequela, meaning that these animals are healthier than infected controls (Figure 7). Of note, although the late-treatment diminished the median time associated with neuromotor sequela, some animals displayed a behaviour similar to CHIKV-infected animals, making these groups statistically indistinguishable. Altogether, our data suggests that sofosbuvir also inhibits CHIKV replication *in vivo*, ameliorating animals' arthralgia, enhancing survival and preserving neuromotor function.

336

337

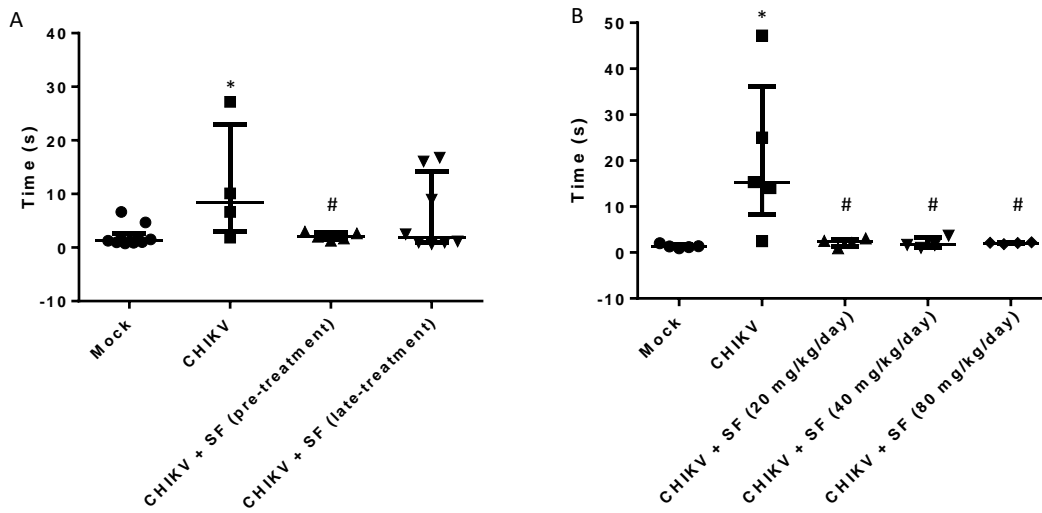

348

349 **Figure 7. Sofosbuvir prevents neuromotor impairment in CHIKV-infected mice.** Three-day-old Swiss mice were infected  
350 with CHIKV ( $2 \times 10^5$  TCID<sub>50</sub>) and treated with sofosbuvir (SF) beginning 1 day before infection (pre-treatment) or on the 2<sup>nd</sup> day  
351 after infection (late-treatment). (A) Treatment was performed with 20 mg/kg/day. (B) Pre-treatment was performed with indicated  
352 concentrations. At the sixth day after infection, animals were turned backwards and allowed up to 60 s to return to the upright  
353 position. The results are presented as the means  $\pm$  SEM. This was a routine measure and at least 10 animals per group were  
354 analysed. Student's t test was used to compare untreated CHIKV-infected mice with other groups individually. \*  $P < 0.01$  mock-  
355 vs CHIKV-infected animals. #  $P < 0.01$  untreated vs treated animals.

356

357

358

359

360

361

362

363

364

365



### 3. Discussion

CHIKV is among the reemergent arboviruses in the early 21<sup>st</sup> century. Although firstly characterized in the 1950's in Tanzania (23), since the 2000's CHIKV activity increased worldwide and reached the new world (24). CF is estimated to cause disability-adjusted life years (DALYs) lost around 45.26 per million people (25). In Brazil, CHIKV was introduced during 2014 (6, 7), when Asian genotype was confirmed in the North Region of Brazil (Oiapoque, Amapá state) and ECSA genotype was identified in the Northeastern region of Brazil (Feira de Santana, Bahia state). The ECSA genotype was subsequently detected throughout Brazil. To the best of our knowledge, Brazil is a rarely case where two genotypes of CHIKV co-circulate. Since early 2016 (summer in the southern hemisphere), DENV, ZIKV and CHIKV co-circulate in Americas, and CHIKV became the most prevalent arbovirus in Brazilian overcrowded cities, like Rio de Janeiro (26). Due to absence of vaccine and specific antiviral treatment, CHIKV prevention depends basically on vector control, whereas patients with CF receive palliative care with nonsteroidal anti-inflammatory drugs (NSAIDs) or corticoids depending on phase of the disease (27).

CHIKV possesses a complex and not fully understood pathogenesis, virus replicate in peripheral organs and may invade the nervous system and synovial fluid (22, 28). Recent efforts to identify substances against CHIKV were carried out, leading to the discovery of chloroquine (29), berberine, abamectin and ivermectin (30). Among these substances, ivermectin was shown to inhibit Flaviviruses NS3 helicase activity (31). By analogy, this drug may also target a CHIKV protein, like nsp2 – which seems to possess an helicase activity (32). The other identified compounds, such as the alkaloid berberine, target cellular rather than viral pathways (33). We, and others, have shown that sofosbuvir is endowed with antiviral activity against flaviviruses (15-17). The recent advances in the CHIKV nsP4 RDRP core domains structure and function highlighted to the presence of conserved motifs among RNA polymerases from positive-sense RNA viruses (9). Indeed, sofosbuvir docked onto CHIKV nsP4 using conserved amino acid residues, also required for binding of UTP, the natural substrate. Sofosbuvir inhibited CHIKV replication in human hepatoma cells. These cells were used because they represent one of the most efficient *in vitro* models to convert sofosbuvir to the active metabolite and liver is a relevant organ for CHIKV pathogenesis (22, 28). Growing evidence indicates that CHIKV may impair neurological function, by directly invading the nervous

393 system (28, 34, 35). We used a sophisticated human iPS-derived astrocyte culture to show that sofosbuvir  
394 inhibits CHIKV replication and virus-associated cell mortality, although in lesser effective manner when  
395 compared to huh-7 cells. Accordingly, in the neonatal mouse model of CHIKV infection, sofosbuvir  
396 enhanced animal survival at doses higher than required to produce the same effect on ZIKV-infected pups  
397 (16). Consistently, sofosbuvir is safe to be used clinically up to 1200 mg per day (12). With respect to the  
398 time frame of opportunity to treat CHIKV-infected mice, a narrow window was observed – similarly to what  
399 we have noticed towards ZIKV (36). In other acute virus infections, like influenza, mortality is dramatically  
400 reduced when neuraminidase inhibitors are administered early in the time course of infection, such as within  
401 2.5 days of infection (37). The identification of individuals at higher risk, to receive sofosbuvir  
402 prophylactically, or very early after infection represent one of the challenges to translate our data into public  
403 health intervention.

404 Moreover, we observed that, at experimental infection conditions milder than required for animal  
405 mortality, sofosbuvir, at reference dose for pre-clinical studies, 20 mg/kg/day (13), protected arthralgia-  
406 related paw oedema. Thus, it is important to further study whether sofosbuvir could act synergistically with  
407 anti-inflammatory drugs to improve the quality of life for patients with CHIKV-associated chronic  
408 arthralgia. Patients with CF very often present arthralgia and impairment of the neuromuscular function,  
409 causing a debilitating condition which contributes to the burden of disease (28). Consistently, using survivor  
410 animals, we observed that sofosbuvir protected CHIKV-infected mice from neuromotor sequelae when  
411 compared to untreated animals. Under this behaviour test, it is likely that both direct neuromotor sequelae  
412 and/or problems on mice articulations may contributed to the high time required for CHIKV-infected  
413 animals to turn from back to upright position.

414 Altogether, our data reveals that CHIKV is susceptible to sofosbuvir, highlighting that other  
415 genetically distinct and clinically important viruses phylogenetically distributed among members of the  
416 Togaviridae and Flaviviridae families could also be susceptible to this drug. Wider use of sofosbuvir,  
417 beyond HCV, may represent a safer antiviral option than ribavirin. Finally, in the context of this study, our  
418 findings motivate phase II clinical investigations on the new use of sofosbuvir as treatment against CHIKV.

420

#### 421 **4. Material and Methods**

422 **Reagents.** The antiviral sofosbuvir ( $\beta$ -d-2'-deoxy-2'- $\alpha$ -fluoro-2'- $\beta$ -C-methyluridine) was donated by the  
423 BMK Consortium: Blanver Farmoquímica Ltda; Microbiológica Química e Farmacêutica Ltda; Karin  
424 Bruning & Cia. Ltda, (Taboão da Serra, São Paulo, Brazil). Ribavirin was received as a donation from the  
425 Instituto de Tecnologia de Farmacos (Farmanguinhos, Fiocruz). All small molecule inhibitors were  
426 dissolved in 100 % dimethylsulfoxide (DMSO) and subsequently diluted at least  $10^4$ -fold in culture or  
427 reaction medium before each assay. The final DMSO concentrations showed no cytotoxicity. The materials  
428 for cell culture were purchased from Thermo Scientific Life Sciences (Grand Island, NY), unless otherwise  
429 mentioned.

430

431 **Cells.** African green monkey kidney (Vero) and human hepatoma (Huh-7) cells were cultured in DMEM.  
432 The culture medium of each cell type was supplemented with 10 % fetal bovine serum (FBS; HyClone,  
433 Logan, Utah), 100 U/mL penicillin, and 100  $\mu$ g/mL streptomycin(38, 39) at 37 °C in 5 % CO<sub>2</sub>.

434

435 **Virus.** CHIKV (Asian strain) was donated by Dr. Amilcar Tanuri. CHIKV was propagated in Vero cells at a  
436 multiplicity of infection (MOI) of 0.1. Infection was carried out for 1 h at 37 °C. Next, the residual virus  
437 particles were removed by washing with phosphate-buffered saline (PBS), and the cells were cultured for an  
438 additional 2 to 5 days. After each period, the cells were lysed by freezing and thawing and centrifuged at  
439 1,500 x g at 4 °C for 20 min to remove cellular debris. Virus titers were determined by classical 10-fold  
440 dilution and tissue cytopathic infectious dose 50 (TCID<sub>50</sub>)/mL calculation.

441

442 **Cytotoxicity assay.** Monolayers of cells 2 to 5 x 10<sup>4</sup> cells/well in 96-well plates were treated for 5 days with  
443 various concentrations of sofosbuvir or ribavirin as a control. Then, 5 mg/ml 2,3-bis-(2-methoxy-4-nitro-5-  
444 sulfophenyl)-2H-tetrazolium-5-carboxanilide (XTT) in DMEM was added to the cells in the presence of  
445 0.01 % of N-methyl dibenzopyrazine methyl sulfate (PMS). After incubating for 4 h at 37 °C, the plates

446 were read in a spectrophotometer at 492 nm and 620 nm (40). The 50 % cytotoxic concentration (CC<sub>50</sub>) was  
447 calculated by a non-linear regression analysis of the dose–response curves.

448 **Yield-reduction assay.** Monolayers of 5 x 10<sup>4</sup> Huh-7 cells/well in 96-well plates were infected with CHIKV  
449 at the MOI of 0.1 for 1 h at 37 °C. The cells were washed with PBS to remove residual viruses, and various  
450 concentrations of sofosbuvir, or ribavirin as a positive control, in DMEM with 1 % FBS were added. After  
451 24 h, the cells were lysed, the cellular debris was cleared by centrifugation, and the virus titers in the  
452 supernatant were determined in Vero cells as TCID<sub>50</sub>/mL. A non-linear regression analysis of the dose-  
453 response curves was performed to calculate the concentration at which each drug inhibited the plaque-  
454 forming activity of CHIKV by 50 % (EC<sub>50</sub>).

455 **Generation of human iPSC-derived astrocytes lines.** Astrocytes were differentiated from neural stem  
456 cells (NSC), 20 x 10<sup>3</sup> cells/well in a 96-well plate, obtained from human iPSC of three control cell lines  
457 from healthy subjects (41). These cell lines were previously used in other studies from our research group  
458 (16). Three cell lines from healthy subjects were obtained from a female subject (GM23279A, available at  
459 Coriell Institute - coriell.org) and the other two from male subjects from cells reprogrammed at the D’Or  
460 Institute for Research and Education (CF1 & CF2). NSCs were differentiated into astrocytes as described in  
461 Yan, 2013 (42). Briefly, NSCs were cultured in differentiation media (1% N2 supplement and 1% FBS in  
462 DMEM/F12) for 21 days with media changes every other day and passages every week. After this period,  
463 glial cells were grown for 5 weeks in 10% FBS in DMEM/F12 with media changes twice a week prior to  
464 use. Cells were infected at MOIs of either 1.0 or 10 for 2 h at 37 °C. Next, the cells were washed, and fresh  
465 medium containing sofosbuvir was added. The cells were treated daily with sofosbuvir at the indicated  
466 concentrations. Virus titers were determined from the culture supernatant. Cell death was measured by  
467 adding 2 µM CellEvent caspase-3/7 reagent and the fluorescent dye ethidium homodimer (43), when the  
468 culture supernatants were collected, on the 5<sup>th</sup> day after infection. Images were acquired with an Operetta  
469 high-content imaging system with a 20x objective and high numerical apertures (NA) (PerkinElmer, USA).  
470 The data were analyzed using the high-content image analysis software Harmony 5.1 (PerkinElmer, USA).  
471 Seven independent fields were evaluated from triplicate wells per experimental condition.

472

473 **3D Modeling of the Chikungunya Virus Nonstructural Protein 4.** The amino acid sequence of the  
474 nonstructural protein 4 (NSP4) of chikungunya virus (CHIKV, UniProtKB ID: F2YI10) was obtained from  
475 ExPASy server (44). The region between Met1-Lys516, part of the nsP4 sequence that includes the whole  
476 catalytic core was considered to construct the model using I-TASSER server (45). The I-TASSER  
477 methodology is very accurate for the construction of protein models when the sequence identity between the  
478 target sequence and the template protein drops below 30 %, where lack of a high-quality structure match  
479 may provide substantial alignment errors and, consequently, poor quality models (45, 46). Thus, the final  
480 model was validated using two programs: PROCHECK (47) and VERIFY3D (48). PROCHECK analyzes  
481 the stereochemical quality and VERIFY3D compatibility analysis between the 3D model and its own amino  
482 acid sequence, by assigning a structural class based on its location and environment, and by comparing the  
483 results with those of crystal structures with good resolutions (47, 48).

484

485 **Molecular Docking.** The structures of SFV and UTP were built in the Spartan'14 software (Wavefunction,  
486 Inc., Irvine, CA). The docking of the two ligands to the nsP4 model was performed using Molegro Virtual  
487 Docker 6.0 (MVD) program (CLC bio, Aarhus, Denmark) (21), which uses a heuristic search algorithm that  
488 combines differential evolution with a cavity prediction algorithm (21). The MolDock scoring function used  
489 is based on a modified piecewise linear potential (PLP) with new hydrogen bonding and electrostatic terms  
490 included. The full description of the algorithm and its reliability compared to other common docking  
491 algorithm have been described (21). The two  $Mg^{2+}$  ions were set as the center of searching space with a  
492 radius value of 10 Å. In addition, the search algorithm MolDock optimizer was used with a minimum of 100  
493 runs and the parameter settings were population size = 500; maximum iteration = 2000; scaling factor =  
494 0.50; offspring scheme = scheme 1; termination scheme = variance-based; crossover rate = 0.90. Due to the  
495 stochastic nature of algorithm search, three independent simulations per ligand were performed to predict  
496 the binding mode. Consequently, the complexes with the lowest interaction energy were evaluated. The  
497 interactions between nsP4 model and each ligand were analyzed using the ligand map algorithm, a standard

498 algorithm in MVD program (21). The usual threshold values for hydrogen bonds and steric interactions were  
499 used.

500 All figures of nsP4 modeling and molecular docking results were edited using Visual Molecular  
501 Dynamics 1.9.3 (VMD) program (available for download at [http://www.ks.uiuc.edu/Research/vmd/vmd-  
502 1.9.3/](http://www.ks.uiuc.edu/Research/vmd/vmd-1.9.3/)) (49).

503  
504 **Animals.** Swiss albino mice (*Mus musculus*) (pathogen-free) from the Oswaldo Cruz Foundation breeding  
505 unit (Instituto de Ciência e Tecnologia em Biomodelos (ICTB)/Fiocruz) were used for these studies. The  
506 animals were kept at a constant temperature (25°C) with free access to chow and water in a 12-h light/dark  
507 cycle. The experimental laboratory received pregnant mice (at approximately the 14th gestational day) from  
508 the breeding unit. Pregnant mice were observed daily until delivery to accurately determine the postnatal  
509 day. We established a litter size of 10 animals for all experimental replicates.

510 The Animal Welfare Committee of the Oswaldo Cruz Foundation (CEUA/FIOCRUZ) approved and  
511 covered (license numbers L-016/2016 and CEUA L-002/2018) the experiments in this study. The procedures  
512 described in this study were in accordance with the local guidelines and guidelines published in the National  
513 Institutes of Health Guide for the Care and Use of Laboratory Animals. The study is reported in accordance  
514 with the ARRIVE guidelines for reporting experiments involving animals(50). If necessary to alleviate  
515 animal suffering, euthanasia was performed. The criteria were the following: i) differences in weight gain  
516 between infected and control groups >50%, ii) ataxia, iii) loss of gait reflex, iv) absence of righting reflex  
517 within 60 seconds, and v) separation, with no feeding, of moribund offspring by the female adult mouse.

### 518 519 **Experimental infection and treatment.**

520 **Neonate model.** Three-day-old Swiss mice were infected intraperitoneally with  $2 \times 10^2$  TCID<sub>50</sub> of virus(51,  
521 52), unless otherwise mentioned. Treatments with sofosbuvir were carried out with sofosbuvir at 20  
522 mg/kg/day intraperitoneally. Treatment started one day prior to infection (pretreatment) or two days after  
523 infection (late treatment). In both cases, treatment was conducted for 6 days. For comparisons, mock-

524 infected and mock-treated groups of animals were used as controls. Animals were monitored daily for  
525 survival, weight gain, and virus-induced short-term sequelae (righting in up to 60 seconds).

526 **Arthralgia model.** Arthralgia model was adapted from previous publications (53, 54). Male Swiss Webster  
527 mice (8 weeks-old; 20-25 g) were infected with  $10^4$  TCID<sub>50</sub> in right hind paw towards the ankle. Sofosbuvir  
528 was given orally (20 mg/kg), beginning one-hour before the first virus injection. Treatment was conducted  
529 for 6 days. Control group was injected with 50  $\mu$ L of RPMI. Paw oedema was evaluated from the first to the  
530 sixth day after infection by hydropletismometer for small volumes (Ugo Basile, Milan, Italy) and data was  
531 presented as paw volume (mL).

532 **Behavioural tests.** To test the righting reflex, animals were tested daily during the course of acute infection.  
533 Animals were held in a supine position with all four paws facing up in the air for 5 seconds. Then, animals  
534 were released, and the time the animal took to flip over onto its stomach with all four paws touching the  
535 surface was measured. A maximum of 60 seconds was given for each trial, and animals were tested twice a  
536 day with a 5-minute minimum interval between trials. For each animal, the lowest time was plotted in the  
537 graph. Animals that failed the test were included in the graph with a time of 60 seconds.

538

539 **Statistical analysis.** All assays were performed and codified by one professional. Subsequently, a different  
540 professional analyzed the results before the identification of the experimental groups. This approach was  
541 used to keep the pharmacological assays blind. All experiments were carried out at least three independent  
542 times, including technical replicates in each assay. The dose-response curves used to calculate the EC<sub>50</sub> and  
543 CC<sub>50</sub> values were generated by Excel for Windows. The dose-response curves used to calculate the IC<sub>50</sub>  
544 values were produced by Prism GraphPad software 5.0. Significance of survival curves was evaluated using  
545 the Log-rank (Mantel-Cox) test. The equations to fit the best curve were generated based on R<sup>2</sup> values  $\geq 0.9$ .  
546 ANOVA, followed by Tukey's post hoc test, tests were also used, with *P* values  $<0.05$  considered  
547 statistically significant. The statistical analyses specific to each software program used in the bioinformatics  
548 analysis are described above.

549

550

## References

- 551 1. Pialoux G, gilles.pialoux@tnn.aphp.fr, Hôpital Tenon SdMleT, Paris, France, Gaüzère B-A, CHD de Saint-Denis  
552 LR, France, Jauréguiberry S, et al. Chikungunya, an epidemic arbovirosis. *The Lancet Infectious Diseases*.  
553 2007;7(5):319-27.
- 554 2. Pinheiro TJ, Hospital dos Servidores do Estado RdJ, Brasil, Hospital dos Servidores do Estado RdJ, Brasil,  
555 Guimarães LF, Hospital dos Servidores do Estado RdJ, Brasil, Hospital dos Servidores do Estado RdJ, Brasil, et al.  
556 Neurological manifestations of Chikungunya and Zika infections. *Arq Neuro-Psiquiatr*. 2016;74(11):937-43.
- 557 3. Parra B, Lizarazo J, Jiménez-Arango JA, Zea-Vera AF, González-Manrique G, Vargas J, et al. Guillain-Barré  
558 Syndrome Associated with Zika Virus Infection in Colombia. <https://doi.org/10.1056/NEJMoa1605564>. 2016.
- 559 4. Prevention C-CfDCa. Geographic Distribution | Chikungunya virus | CDC. 2018.
- 560 5. Souza TMA, Viral Immunology Laboratory OCI, Rio de Janeiro, Brazil, Azeredo EL, Viral Immunology  
561 Laboratory OCI, Rio de Janeiro, Brazil, Badolato-Corrêa J, Viral Immunology Laboratory OCI, Rio de Janeiro, Brazil, et  
562 al. First Report of the East-Central South African Genotype of Chikungunya Virus in Rio de Janeiro, Brazil. *PLOS*  
563 *Currents Outbreaks*. 2018.
- 564 6. Charlys da Costa A, Thézé J, Komninakis SCV, Sanz-Duro RL, Felinto MRL, Moura LCC, et al. Spread of  
565 Chikungunya Virus East/Central/South African Genotype in Northeast Brazil. *Emerg Infect Dis*. 2017. p. 1742-4.
- 566 7. Nunes MRT, Faria NR, Vasconcelos JMd, Golding N, Kraemer MU, Oliveira LFd, et al. Emergence and potential  
567 for spread of Chikungunya virus in Brazil. *BMC Medicine*. 2015;13(1):102.
- 568 8. Strauss JH, Strauss EG. The alphaviruses: gene expression, replication, and evolution. *Microbiol Rev*.  
569 1994;58(3):491-562.
- 570 9. Chen MW, Tan YB, Zheng J, Zhao Y, Lim BT, Cornvik T, et al. Chikungunya virus nsP4 RNA-dependent RNA  
571 polymerase core domain displays detergent-sensitive primer extension and terminal adenylyltransferase activities.  
572 *Antiviral Res*. 2017;143:38-47.
- 573 10. Gohara DW, Crotty S, Arnold JJ, Yoder JD, Andino R, Cameron CE. Poliovirus RNA-dependent RNA polymerase  
574 (3Dpol): structural, biochemical, and biological analysis of conserved structural motifs A and B. *J Biol Chem*.  
575 2000;275(33):25523-32.
- 576 11. Bhatia HK, Singh H, Grewal N, Natt NK. Sofosbuvir: A novel treatment option for chronic hepatitis C infection.  
577 *J Pharmacol Pharmacother*. 2014;5(4):278-84.
- 578 12. Gilead. Product Monograph Pr SOVALDI® (sofosbuvir) Tablets 400 mg sofosbuvir Antiviral Agent 2015  
579 [Available from: <http://www.gilead.com/-/media/8c41933bdd5d4e4691af495f40aa6016.ashx>.
- 580 13. European Medicines Agency, EMA. Sovaldi 2013 [Available from:  
581 [http://www.ema.europa.eu/docs/en\\_GB/document\\_library/EPAR\\_Public\\_assessment\\_report/human/002798/WC5](http://www.ema.europa.eu/docs/en_GB/document_library/EPAR_Public_assessment_report/human/002798/WC500160600.pdf)  
582 [00160600.pdf](http://www.ema.europa.eu/docs/en_GB/document_library/EPAR_Public_assessment_report/human/002798/WC500160600.pdf).
- 583 14. Ferreira AC, Zaverucha-do-Valle C, Reis PA, Barbosa-Lima G, Vieira YR, Mattos M, et al. Sofosbuvir protects  
584 Zika virus-infected mice from mortality, preventing short- and long-term sequelae. *Scientific Reports*.  
585 2017;7(1):9409.
- 586 15. Bullard-Feibelman KM, Govero J, Zhu Z, Salazar V, Veselinovic M, Diamond MS, et al. The FDA-approved drug  
587 sofosbuvir inhibits Zika virus infection. *Antiviral Res*. 2017;137:134-40.
- 588 16. Sacramento CQ, de Melo GR, de Freitas CS, Rocha N, Hoelz LV, Miranda M, et al. The clinically approved  
589 antiviral drug sofosbuvir inhibits Zika virus replication. *Sci Rep*. 2017;7:40920.
- 590 17. Onorati M, Li Z, Liu F, Sousa AM, Nakagawa N, Li M, et al. Zika virus disrupts phospho-TBK1 localization and  
591 mitosis in human neuroepithelial stem cells and radial glia. *Cell Rep*. 2016;16(10):2576-92.
- 592 18. Freitas Cd, Higa L, Sacramento C, Ferreira A, Reis P, Delvecchio R, et al. Yellow fever virus is susceptible to  
593 sofosbuvir both in vitro and in vivo. 2018.
- 594 19. Xu H-T, Colby-Germinario SP, Hassounah SA, Fogarty C, Osman N, Palanisamy N, et al. Evaluation of  
595 Sofosbuvir ( $\beta$ -D-2'-deoxy-2'- $\alpha$ -fluoro-2'- $\beta$ -C-methyluridine) as an inhibitor of Dengue virus replication #. *Scientific*  
596 *Reports*. 2017;7(1):6345.
- 597 20. Vicenti I, Boccuto A, Giannini A, Dragoni F, Saladini F, Zazzi M. Comparative analysis of different cell systems  
598 for Zika virus (ZIKV) propagation and evaluation of anti-ZIKV compounds in vitro. *Virus Res*. 2018;244:64-70.
- 599 21. Thomsen R, Christensen MH. MolDock: a new technique for high-accuracy molecular docking. *J Med Chem*.  
600 2006;49(11):3315-21.
- 601 22. Ganesan VK, Duan B, Reid SP. Chikungunya Virus: Pathophysiology, Mechanism, and Modeling. *Viruses*.  
602 2017;9(12).



- 603 23. MASON PJ, HADDOW AJ. An epidemic of virus disease in Southern Province, Tanganyika Territory, in 1952-  
604 53; an additional note on Chikungunya virus isolations and serum antibodies. *Trans R Soc Trop Med Hyg.*  
605 1957;51(3):238-40.
- 606 24. Weaver SC. Arrival of Chikungunya Virus in the New World: Prospects for Spread and Impact on Public  
607 Health. *PLoS Negl Trop Dis.* 2014;8(6).
- 608 25. Krishnamoorthy K, Harichandrakumar KT, Krishna Kumari A, Das LK. Burden of chikungunya in India:  
609 estimates of disability adjusted life years (DALY) lost in 2006 epidemic. *J Vector Borne Dis.* 2009;46(1):26-35.
- 610 26. Saúde SdVe, Saúde Md. Monitoramento dos casos de dengue, febre de chikungunya e febre pelo vírus Zika  
611 até a Semana Epidemiológica 8 de 2018: Ministerio da Saude; 2018 [Available from:  
612 <http://portalarquivos2.saude.gov.br/images/pdf/2018/marco/29/2018-010.pdf>.
- 613 27. World Health Organization ROFS-EA. Guidelines on clinical management of chikungunya fever [Publications].  
614 WHO Regional Office for South-East Asia; 2008 [updated 2008. Available from:  
615 <http://apps.who.int/iris/handle/10665/205178>.
- 616 28. Gasque P, UMR PIMIT PleMITudLR, INSERM U1187, CNRS 9192, IRD 249, St. Denis, France, Bandjee MCJ,  
617 UMR PIMIT PleMITudLR, INSERM U1187, CNRS 9192, IRD 249, St. Denis, France, Reyes MM, National Health Institute  
618 PHRD, Bogotá, et al. Chikungunya Pathogenesis: From the Clinics to the Bench. *The Journal of Infectious Diseases.*  
619 2018;214(suppl\_5).
- 620 29. Abdelnabi R, Neyts J, Delang L. Towards antivirals against chikungunya virus. *Antiviral Res.* 2015;121:59-68.
- 621 30. Varghese FS, Kaukinen P, Gläsker S, Bespalov M, Hanski L, Wennerberg K, et al. Discovery of berberine,  
622 abamectin and ivermectin as antivirals against chikungunya and other alphaviruses. *Antiviral Res.* 2016;126:117-24.
- 623 31. Mastrangelo E, Pezzullo M, De Burghgraeve T, Kaptein S, Pastorino B, Dallmeier K, et al. Ivermectin is a  
624 potent inhibitor of flavivirus replication specifically targeting NS3 helicase activity: new prospects for an old drug. *J*  
625 *Antimicrob Chemother.* 2012;67(8):1884-94.
- 626 32. Das PK, Merits A, Lulla A. Functional cross-talk between distant domains of chikungunya virus non-structural  
627 protein 2 is decisive for its RNA-modulating activity. *J Biol Chem.* 2014;289(9):5635-53.
- 628 33. Varghese FS, Thaa B, Amrun SN, Simarmata D, Rausalu K, Nyman TA, et al. The Antiviral Alkaloid Berberine  
629 Reduces Chikungunya Virus-Induced Mitogen-Activated Protein Kinase Signaling. *J Virol.* 2016;90(21):9743-57.
- 630 34. Inglis FM, Lee KM, Chiu KB, Purcell OM, Didier PJ, Russell-Lodrigues K, et al. Neuropathogenesis of  
631 Chikungunya Infection: Astrogliosis and Innate Immune Activation. *J Neurovirol.* 2016;22(2):140-8.
- 632 35. Brizzi K. Neurologic Manifestation of Chikungunya Virus | SpringerLink. 2018.
- 633 36. Ferreira A, Valle C, Reis P, Barbosa-Lima G, Vieira Y, Mattos M, et al. Sofosbuvir protects Zika virus-  
634 infected mice from mortality, preventing short- and long-term sequela. *bioRxiv* 2017.
- 635 37. Muthuri SG, Venkatesan S, Myles PR, Leonardi-Bee J, Al Khuwaitir TS, Al Mamun A, et al. Effectiveness of  
636 neuraminidase inhibitors in reducing mortality in patients admitted to hospital with influenza A H1N1pdm09 virus  
637 infection: a meta-analysis of individual participant data. *Lancet Respir Med.* 2014;2(5):395-404.
- 638 38. Li GY, Li BG, Yang T, Liu GY, Zhang GL. Chaetoinidicins A-C, three isoquinoline alkaloids from the fungus  
639 *Chaetomium indicum*. *Org Lett.* 2006;8(16):3613-5.
- 640 39. Zhang H, Wang YF, Shen CH, Agniswamy J, Rao KV, Xu CX, et al. Novel P2 tris-tetrahydrofuran group in  
641 antiviral compound 1 (GRL-0519) fills the S2 binding pocket of selected mutants of HIV-1 protease. *J Med Chem.*  
642 2013;56(3):1074-83.
- 643 40. Scudiero DA, Shoemaker RH, Paull KD, Monks A, Tierney S, Nofziger TH, et al. Evaluation of a soluble  
644 tetrazolium/formazan assay for cell growth and drug sensitivity in culture using human and other tumor cell lines.  
645 *Cancer Res.* 1988;48(17):4827-33.
- 646 41. Garcez PP, Loiola EC, Madeiro da Costa R, Higa LM, Trindade P, Delvecchio R, et al. Zika virus impairs growth  
647 in human neurospheres and brain organoids. *Science.* 2016.
- 648 42. Yan Y, Shin S, Jha BS, Liu Q, Sheng J, Li F, et al. Efficient and rapid derivation of primitive neural stem cells and  
649 generation of brain subtype neurons from human pluripotent stem cells. *Stem Cells Transl Med.* 2013;2(11):862-70.
- 650 43. Sauter NK, Hanson JE, Glick GD, Brown JH, Crowther RL, Park SJ, et al. Binding of influenza virus  
651 hemagglutinin to analogs of its cell-surface receptor, sialic acid: analysis by proton nuclear magnetic resonance  
652 spectroscopy and X-ray crystallography. *Biochemistry.* 1992;31(40):9609-21.
- 653 44. Gasteiger E, Gattiker A, Hoogland C, Ivanyi I, Appel RD, Bairoch A. ExPASy: The proteomics server for in-depth  
654 protein knowledge and analysis. *Nucleic Acids Res.* 2003;31(13):3784-8.
- 655 45. Yang J, Yan R, Roy A, Xu D, Poisson J, Zhang Y. The I-TASSER Suite: protein structure and function prediction.  
656 *Nat Methods.* 2015;12(1):7-8.

- 657 46. Gazos-Lopes F, Oliveira MM, Hoelz LV, Vieira DP, Marques AF, Nakayasu ES, et al. Structural and functional  
658 analysis of a platelet-activating lysophosphatidylcholine of *Trypanosoma cruzi*. *PLoS Negl Trop Dis*. 2014;8(8):e3077.  
659 47. R. A. Laskowski MWM, D. S. Moss and J. M. Thornton, TI. PROCHECK: a program to check the  
660 stereochemical quality of protein structures. *Journal of Applied Crystallography*. 1993;26(2):283-91.  
661 48. Eisenberg D, Lüthy R, Bowie JU. VERIFY3D: assessment of protein models with three-dimensional profiles.  
662 *Methods Enzymol*. 1997;277:396-404.  
663 49. Humphrey W, Dalke A, Schulten K. VMD: visual molecular dynamics. *J Mol Graph*. 1996;14(1):33-8, 27-8.  
664 50. Kilkenny C, Browne WJ, Cuthill IC, Emerson M, Altman DG. Improving bioscience research reporting: the  
665 ARRIVE guidelines for reporting animal research. *Osteoarth Cartil*. 2012;20(4):256-60.  
666 51. van den Pol AN, Mao G, Yang Y, Ornaghi S, Davis JN. Zika virus targeting in the developing brain. *J Neurosci*.  
667 2017;37(8):2161-75.  
668 52. Huang WC, Abraham R, Shim BS, Choe H, Page DT. Zika virus infection during the period of maximal brain  
669 growth causes microcephaly and corticospinal neuron apoptosis in wild type mice. *Sci Rep*. 2016;6:34793.  
670 53. Hawman DW, Stoermer KA, Montgomery SA, Pal P, Oko L, Diamond MS, et al. Chronic joint disease caused  
671 by persistent Chikungunya virus infection is controlled by the adaptive immune response. *J Virol*. 2013;87(24):13878-  
672 88.  
673 54. Gardner J, Anraku I, Le TT, Larcher T, Major L, Roques P, et al. Chikungunya virus arthritis in adult wild-type  
674 mice. *J Virol*. 2010;84(16):8021-32.

675

## 676 **AUTHOR CONTRIBUTIONS**

677 Performed the experiments – ACF, PAR, CSdeF, CQS, LVBH, MMB, MM, ECL, PT, YRV, GB-L

678 Conceptualized the experiments and fund raising – HCCFN, NB, SKR, KB, FAB, PTB, TMLS

679 Provided critical material – KB

680 Study organization - TMLS

681 All authors revised and approved the manuscript.

## 682 **Financial Support**

683 Funders had no role in the experiment design or interpretation

684

## 685 **Acknowledgements**

686 Funding was provided by National Council for Scientific and Technological Development (CNPq), Ministry  
687 of Science, Technology, Information and Communications (grants including, but not limited to, #  
688 465313/2014-0; Ministry of Education/CAPES (# 465313/2014-0); Research Foundation of the State of Rio  
689 de Janeiro (FAPERJ) (grants including, but not limited to, # 465313/2014-0 and Oswaldo Cruz Foundation  
690 (Fiocruz).

691

## 692 **Conflict of Interest**

693 A competing financial interest exists for KB, who is partner in a consortium able to produce generic  
694 sofosbuvir. The consortium and her participation was limited to provide the sofosbuvir for this study.

695

696

697

698

699

700

701

702

703

704

705

706

707

708

709

710

711

712
